# Supplementary material
Source: PubMed Central journal article supplement (PMC6166661)
Supplement: NIHMS978209-supplement.pdf [file NIHMS978209-supplement.pdf]

# TLQP-21 in mPlasma: 0 min

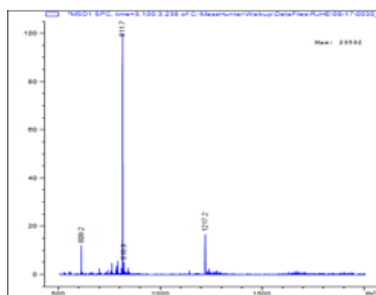

T L Q P P A S S R R    R H F H H A L P P A    R

|                        |            |                      |            |
|------------------------|------------|----------------------|------------|
| Ave Mass:              | 2432.74    | (M+5H) <sup>5+</sup> | 487.548    |
| (M+H) <sup>+</sup> :   | 2433.74797 | (M+6H) <sup>6+</sup> | 406.456667 |
| (M+2H) <sup>2+</sup> : | 1217.37797 | (M+7H) <sup>7+</sup> | 348.534286 |
| (M+3H) <sup>3+</sup> : | 811.921303 | (M+8H) <sup>8+</sup> | 305.0925   |
| (M+4H) <sup>4+</sup> : | 609.19297  | (M+9H) <sup>9+</sup> | 271.304444 |

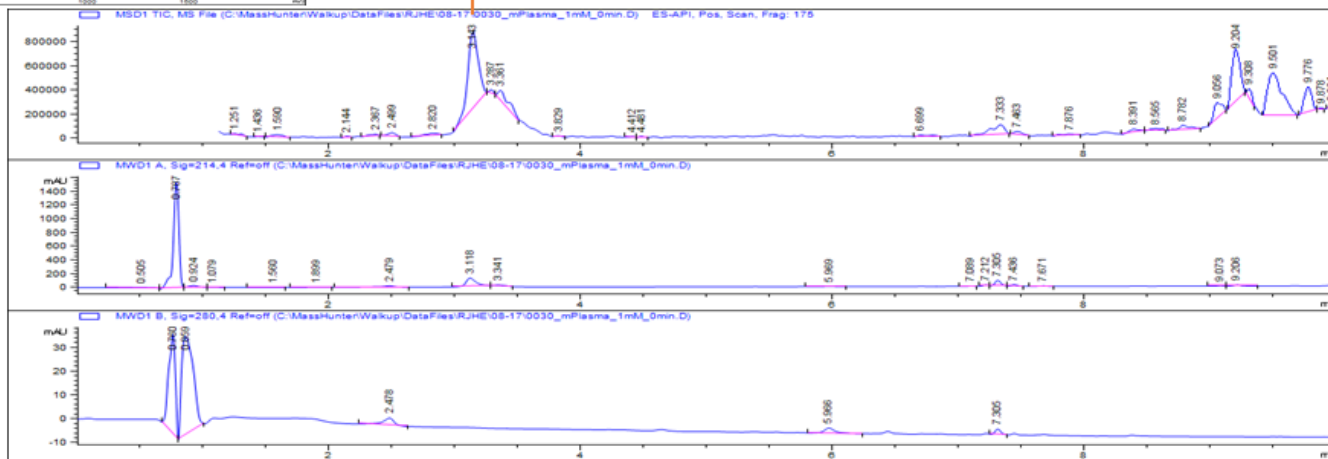

Supplementary Figure 1

# TLQP-21 in mPlasma: 10 min

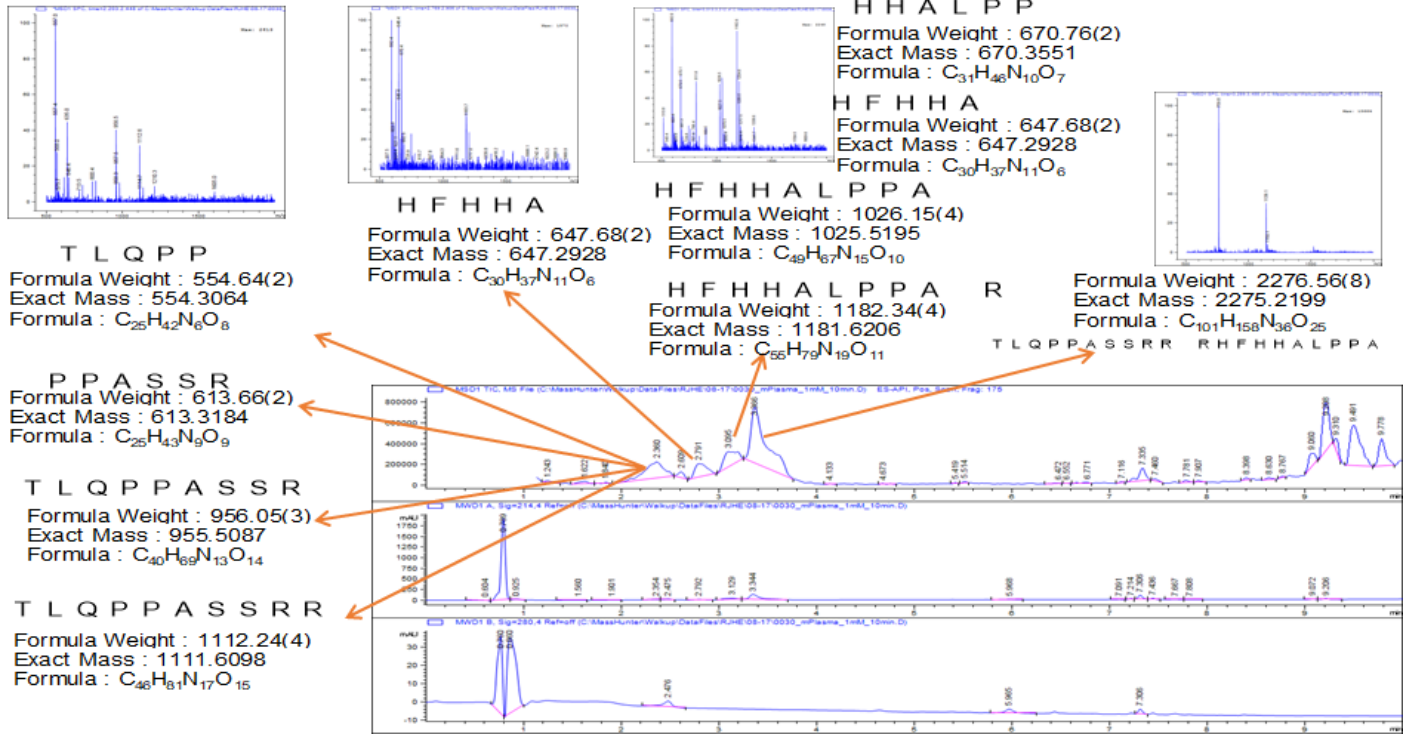

Supplementary Figure 2

# TLQP-21 in mPlasma: 60 min

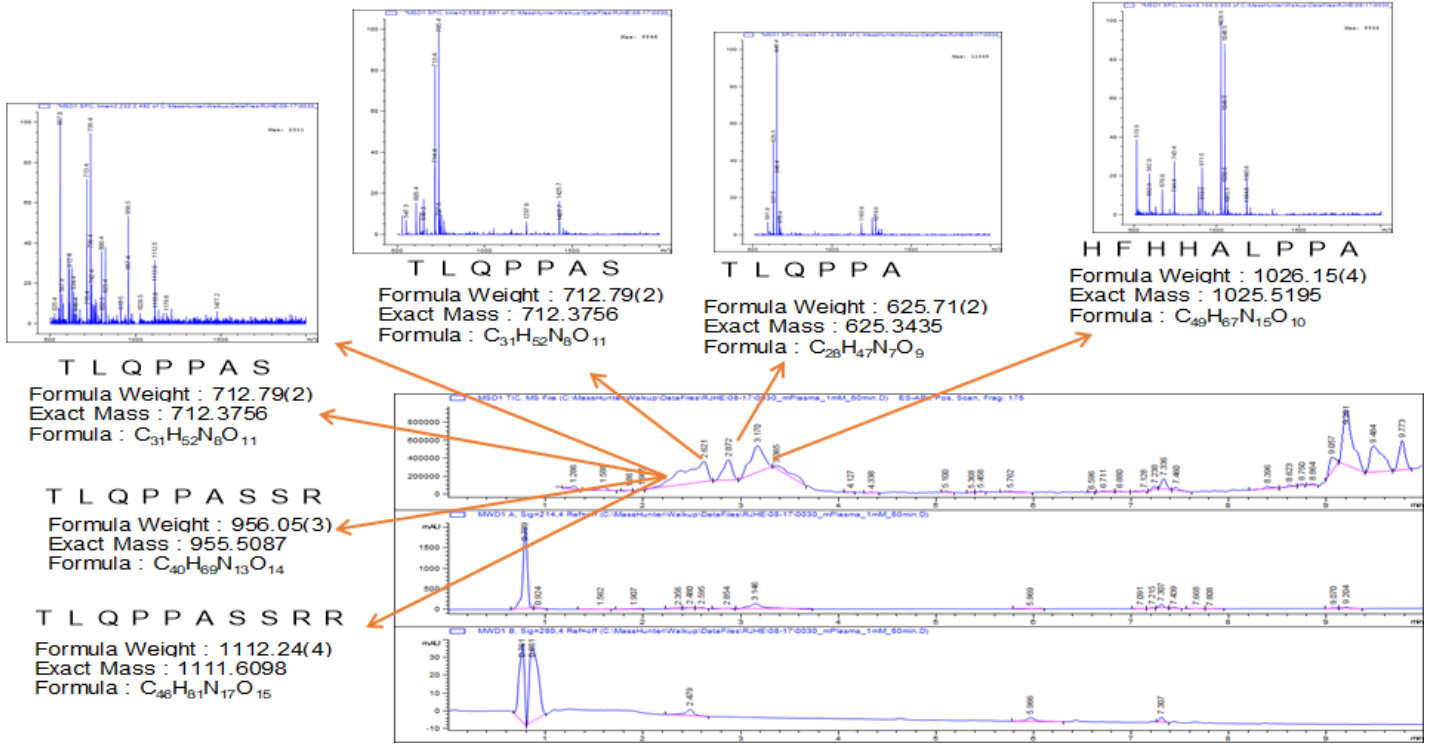

Supplementary Figure 3
